# Supplementary material for: Lactobacillus plantarumandBifidobacterium bifidumalleviate dry eye in mice with exorbital lacrimal gland excision by modulating gut inflammation and microbiota
Source: Royal Society of Chemistry journal article supplement (doi:10.1039/d0fo02984j), 2021-01-01
Supplement: d0fo02984j1.pdf [file d0fo02984j1.pdf]

[Supplement]

***Lactobacillus plantarum* and *Bifidobacterium bifidum* alleviate dry eye in mice with exorbital lacrimal gland excision by modulating gut inflammation and microbiota**

Soo-won Yun<sup>a,#</sup>, Young-Hoo Son<sup>b,#</sup>, Dong-Yun Lee<sup>b</sup>, Yoon-Jung Shin<sup>b</sup>, Myung Joo Han<sup>a,\*</sup>, and Dong-Hyun Kim<sup>b,\*</sup>

Table S1. Ingredients of mouse chow diet used in the present study

| Ingredient                         | Weight (g) |
|------------------------------------|------------|
| Casein, 80 mesh                    | 200        |
| L-cysteine                         | 3          |
| Corn starch                        | 315        |
| Maltodextrin 10                    | 35         |
| Sucrose                            | 350        |
| Cellulose, BW200                   | 50         |
| Soybean oil                        | 25         |
| Lard                               | 20         |
| Mineral mix S10026                 | 10         |
| Dicalcium phosphate                | 13         |
| Calcium carbonate                  | 5.5        |
| Potassium citrate·H <sub>2</sub> O | 16.5       |
| Vitamin mix V10001                 | 10         |
| Choline bitartrate                 | 2          |
| FD&C yellow dye #5                 | 0.05       |
| Total                              | 1,055.05   |
| Protein (Kcal%)                    | 19.2       |
| Carbohydrate (Kcal%)               | 67.3       |
| Fat (Kcal%)                        | 4.3        |

Table S2. Food intake and weight gain of mice

|                     | Group in C57BL/6 mice |             |             |             |             |             | Group in BALB/c Mice |             |             |
|---------------------|-----------------------|-------------|-------------|-------------|-------------|-------------|----------------------|-------------|-------------|
|                     | CON                   | SHA         | DE          | LP          | BB          | LB (3:2)    | CON                  | DE          | LB (4:1)    |
| Food intake (g/day) | 4.3<br>±0.7           | 3.5<br>±0.9 | 3.6±<br>1.0 | 3.7±<br>0.7 | 3.8<br>±0.6 | 3.7±<br>0.7 | 3.4<br>±0.4          | 3.1<br>±0.7 | 3.2<br>±0.8 |
| Weight gain (g)     | 2.1<br>±0.4           | 2.2<br>±0.6 | 2.0<br>±0.2 | 1.8<br>±0.5 | 1.9<br>±0.3 | 1.8<br>±0.5 | 2.4<br>±0.1          | 2.6<br>±0.6 | 2.0<br>±0.3 |

Table S3. Effects of NK151, NK175, and NKM on the gut microbiota composition at the phylum level in mice with ELA-induced dry eye

| Taxon           | Mean ± SD              |          |                      |           |           |          |
|-----------------|------------------------|----------|----------------------|-----------|-----------|----------|
|                 | CON <sup>a</sup>       | SHA      | DE                   | LP        | BB        | LB(3:2)  |
| Bacteroidetes   | 55.2±12.4 <sup>b</sup> | 48.9±6.0 | 49.1±9.5             | 57.2±11.5 | 53.9±9.6  | 58.5±7.2 |
| Firmicutes      | 39.9±13.9              | 43.8±5.6 | 37.1±11.3            | 34.5±12.8 | 37.0±10.9 | 32.2±7.3 |
| Proteobacteria  | 2.9±1.1                | 3.5±2.0  | 5.0±2.6              | 4.3±1.5   | 6.0±2.5   | 5.0±2.1  |
| Verrucomicrobia | 0.9±1.7                | 1.4±2.9  | 5.6±7.7              | 1.4±1.5   | 0.6±1.0   | 2.1±2.8  |
| Cyanobacteria   | 0.8±0.8                | 1.7±2.2  | 2.1±2.6              | 0.7±0.5   | 1.5±1.4   | 1.3±1.8  |
| Actinobacteria  | 0.1±0.0                | 0.1±0.1  | 0.5±0.4 <sup>#</sup> | 0.2±0.5   | 0.2±0.2   | 0.4±0.7  |
| Tenericutes     | 0.1±0.2                | 0.2±0.2  | 0.6±0.8              | 1.5±2.3   | 0.6±0.5   | 0.4±0.4  |
| Deferribacteres | ND <sup>c</sup>        | 0.3±0.6  | 0.1±0.1              | 0.1±0.1   | 0.1±0.1   | 0.0±0.0  |

<sup>a</sup>)NK151 (LP), NK175 (BB), and their (3:2) mixture (LB, 5×10<sup>9</sup> CFU/mouse/day) orally gavaged daily for 10 days from 25 h after the exposure to ELA (exorbital lacrimal gland excision and 1% atropine/0.1% benzalkonium chloride solution treatment). Normal control mice (CON) and mice exposed with the ELA (DE) were treated with vehicle instead of probiotics.

<sup>b</sup>)Data values were described as mean ± SD (n = 7).

<sup>c</sup>)not detected

<sup>#</sup>p<0.05 vs. SHA group. \*p<0.05 vs. DE group.

Table S4. Effects of NK151, NK175, and NKM on the gut microbiota composition at the family level in mice with ELA-induced dry eye

| Taxon               | Mean ± SD              |           |                      |           |           |           |
|---------------------|------------------------|-----------|----------------------|-----------|-----------|-----------|
|                     | CON <sup>a</sup>       | SHA       | DE                   | LP        | BB        | LB(3:2)   |
| Prevotellaceae      | 32.1±10.5 <sup>b</sup> | 26.0±9.7  | 22.1±8.3             | 26.7±10.7 | 21.8±4.4  | 18.8±6.0  |
| Lactobacillaceae    | 18.1±15.4              | 18.1±9.4  | 6.7±3.9 <sup>#</sup> | 9.5±8.2   | 3.8±2.5   | 9.1±9.2   |
| Ruminococcaceae     | 12.5±5.5               | 7.9±6.3   | 11.2±3.5             | 8.2±3.4   | 8.6±3.1   | 7.4±3.0   |
| Muribaculaceae      | 11.5±3.3               | 12.3±4.3  | 11.6±3.8             | 15.9±3.9  | 19.1±4.0* | 22.4±6.5* |
| Lachnospiraceae     | 8.1±3.4                | 16.8±11.9 | 17.9±11.8            | 15.6±6.1  | 23.5±13.1 | 13.1±6.4  |
| Bacteroidaceae      | 7.5±4.3                | 6.5±3.8   | 11.2±5.1             | 9.6±6.0   | 7.5±3.1   | 12.1±5.9  |
| Rikenellaceae       | 2.2±1.0                | 1.6±0.7   | 2.2±0.9              | 3.1±1.0   | 3.2±0.7*  | 3.2±2.0   |
| Sutterellaceae      | 1.1±1.1                | 0.6±0.4   | 1.0±0.7              | 0.5±0.3   | 0.5±0.1   | 1.1±0.6   |
| Helicobacteraceae   | 1.0±0.7                | 1.4±1.2   | 1.5±1.4              | 1.6±1.2   | 2.4±0.8   | 1.2±1.2   |
| Porphyromonadaceae  | 0.9±0.7                | 1.0±0.5   | 0.8±0.5              | 1.2±1.0   | 1.2±0.5   | 1.0±0.7   |
| Akkermansiaceae     | 0.9±1.7                | 1.4±2.9   | 5.6±7.7              | 1.4±1.5   | 0.6±1.0   | 2.1±2.8   |
| FR888536_f          | 0.8±0.8                | 1.7±2.2   | 2.1±2.6              | 0.7±0.5   | 1.5±1.4   | 1.3±1.8   |
| AC160630_f          | 0.7±0.5                | 0.3±0.3   | 1.1±0.8 <sup>#</sup> | 0.6±0.4   | 1.0±0.7   | 0.8±1.0   |
| Desulfovibrionaceae | 0.6±0.3                | 1.4±1.0   | 2.3±2.1              | 1.8±0.9   | 2.2±1.6   | 2.0±1.5   |
| Erysipelotrichaceae | 0.5±0.6                | 0.6±0.7   | 0.7±0.7              | 0.6±1.0   | 0.6±0.6   | 1.9±1.9   |
| Odoribacteraceae    | 0.2±0.6                | 1.1±2.4   | 0.0±0.1              | 0.1±0.1   | 0.1±0.1   | 0.2±0.3   |
| Clostridiaceae      | 0.2±0.2                | 0.0±0.1   | 0.1±0.1              | 0.1±0.1   | 0.1±0.1   | 0.2±0.3   |

|                     |         |                 |         |         |         |          |
|---------------------|---------|-----------------|---------|---------|---------|----------|
| Christensenellaceae | 0.2±0.2 | 0.2±0.1         | 0.2±0.2 | 0.2±0.2 | 0.2±0.2 | 0.3±0.3  |
| Rhodospirillaceae   | 0.2±0.3 | 0.1±0.1         | 0.2±0.2 | 0.3±0.4 | 1.0±1.2 | 0.6±0.6  |
| Enterococcaceae     | 0.1±0.1 | ND <sup>c</sup> | 0.0±0.1 | ND      | ND      | 0.1±0.1  |
| Dehalobacterium_f   | 0.1±0.1 | 0.2±0.1         | 0.3±0.2 | 0.2±0.1 | 0.2±0.1 | 0.2±0.2  |
| Coriobacteriaceae   | 0.1±0.1 | ND              | ND      | ND      | ND      | 0.1±0.1* |
| Bacteroidales_uc    | 0.1±0.1 | 0.1±0.1         | 0.1±0.1 | 0.1±0.1 | 0.1±0.0 | ND*      |
| PAC000197_f         | ND      | ND              | 0.1±0.0 | ND      | 0.1±0.1 | ND       |
| Deferribacteraceae  | 0.0±0.0 | 0.3±0.6         | 0.1±0.1 | 0.1±0.1 | 0.1±0.1 | ND       |

<sup>a</sup>)NK151 (LP), NK175 (BB), and their (3:2) mixture (LB, 5×10<sup>9</sup> CFU/mouse/day) orally gavaged daily for 10 days from 25 h after the exposure to ELA (exorbital lacrimal gland excision and 1% atropine/0.1% benzalkonium chloride solution treatment). Normal control mice (CON) and mice exposed with the ELA (DE) were treated with vehicle instead of probiotics.

<sup>b</sup>)Data values were described as mean ± SD (n = 7).

<sup>c</sup>)not detected

#p<0.05 vs. SHA group. \*p<0.05 vs. DE group.

Table S5. Effects of NK151, NK175, and NKM on the gut microbiota composition at the genus level in mice with ELA-induced dry eye

| Taxon                | Mean ± SD              |          |                      |          |          |          |
|----------------------|------------------------|----------|----------------------|----------|----------|----------|
|                      | CON <sup>a</sup>       | SHA      | DE                   | LP       | BB       | LB(3:2)  |
| Lactobacillus        | 17.8±14.0 <sup>b</sup> | 17.9±8.6 | 6.7±3.6 <sup>#</sup> | 9.4±7.5  | 3.8±2.3  | 9.0±8.4  |
| Prevotellaceae_uc    | 12.2±4.7               | 13.5±4.7 | 8.6±3.0 <sup>#</sup> | 10.6±6.0 | 12.0±4.3 | 4.6±4.7  |
| Prevotella           | 11.6±5.8               | 7.7±4.8  | 7.7±4.1              | 8.9±5.4  | 7.1±4.4  | 8.0±2.9  |
| Paraprevotella       | 7.8±7.7                | 4.5±6.6  | 5.8±4.3              | 6.9±6.4  | 2.7±1.9  | 2.3±2.7  |
| Bacteroides          | 7.5±4.0                | 6.5±3.5  | 11.2±4.8             | 9.6±5.6  | 7.5±2.9  | 12.1±5.4 |
| Ruminococcus         | 6.4±3.3                | 3.1±3.8  | 3.6±1.8              | 2.0±1.9  | 2.1±2.4  | 1.0±1.0* |
| PAC001068_g          | 3.9±0.8                | 5.1±1.8  | 2.9±1.1 <sup>#</sup> | 4.1±1.8  | 4.5±1.4  | 7.8±1.9* |
| Muribaculaceae_uc    | 2.6±0.7                | 3.0±1.0  | 3.9±1.6              | 4.5±0.7  | 5.6±0.9* | 6.3±2.2  |
| PAC000661_g          | 2.0±1.1                | 1.3±1.5  | 1.8±0.9              | 1.3±1.1  | 1.3±1.5  | 0.6±0.7  |
| Alistipes            | 1.9±0.7                | 1.5±0.6  | 1.8±0.9              | 2.6±1.0  | 2.8±0.8  | 3.1±1.9  |
| PAC000186_g          | 1.9±0.7                | 2.1±0.9  | 1.6±0.7              | 2.9±0.9* | 3.7±1.4* | 3.4±2.0  |
| PAC000664_g          | 1.7±2.3                | 2.7±2.3  | 5.8±3.7              | 1.8±1.2* | 2.8±2.2  | 1.1±1.0* |
| Eubacterium_g23      | 1.6±1.2                | 0.8±0.8  | 1.6±1.2              | 0.4±0.3* | 0.6±0.5  | 1.9±1.5  |
| Parasutterella       | 1.0±0.9                | 0.6±0.3  | 0.8±0.6              | 0.5±0.3  | 0.4±0.1  | 0.9±0.6  |
| Helicobacter         | 1.0±0.7                | 1.4±1.1  | 1.5±1.3              | 1.6±1.1  | 2.3±0.7  | 1.2±1.1  |
| Pseudoflavonifractor | 0.9±0.3                | 1.2±0.6  | 1.9±0.6              | 1.8±0.5  | 1.8±0.8  | 1.6±0.9  |
| Parabacteroides      | 0.9±0.6                | 1.0±0.5  | 0.8±0.4              | 1.2±0.9  | 1.2±0.5  | 1.0±0.7  |
| Akkermansia          | 0.9±1.5                | 1.4±2.7  | 5.5±7.0              | 1.4±1.4  | 0.6±0.9  | 2.1±2.6  |
| FR888536_g           | 0.8±0.8                | 1.7±2.0  | 2.1±2.4              | 0.7±0.5  | 1.5±1.3  | 1.2±1.6  |
| KE159538_g           | 0.8±1.3                | 6.7±8.5  | 0.4±0.4              | 4.9±6.0  | 7.9±11.0 | 3.4±3.4  |
| PAC002482_g          | 0.7±0.5                | 0.3±0.3  | 1.1±0.7 <sup>#</sup> | 0.6±0.4  | 1.0±0.7  | 0.8±0.9  |

|                |         |         |         |          |                 |          |
|----------------|---------|---------|---------|----------|-----------------|----------|
| PAC001092_g    | 0.6±0.5 | 0.7±0.6 | 1.0±1.1 | 0.5±0.3  | 0.6±0.3         | 0.6±0.7  |
| LT706945_g     | 0.5±0.3 | 1.0±0.7 | 1.8±1.5 | 1.4±1.0  | 1.6±1.1         | 0.7±0.6  |
| Alloprevotella | 0.5±0.6 | 0.2±0.5 | 0.0±0.0 | 0.2±0.3  | ND <sup>c</sup> | 3.9±6.4  |
| PAC000198_g    | 0.5±0.2 | 0.8±0.7 | 0.4±0.2 | 0.8±0.2* | 1.2±0.6*        | 1.4±0.8* |

<sup>a</sup>)NK151 (LP), NK175 (BB), and their (3:2) mixture (LB, 5×10<sup>9</sup> CFU/mouse/day) orally gavaged daily for 10 days from 25 h after the exposure to ELA (exorbital lacrimal gland excision and 1% atropine/0.1% benzalkonium chloride solution treatment). Normal control mice (CON) and mice exposed with the ELA (DE) were treated with vehicle instead of probiotics.

<sup>b</sup>)Data values were described as mean ± SD (n = 7).

<sup>c</sup>)not detected

#p<0.05 vs. SHA group. \*p<0.05 vs. DE group.

Table S6. Effects of NK151, NK175, and NKM on the gut microbiota composition at the species level in mice with ELA-induced dry eye

| Taxon                          | Mean ± SD              |                      |                      |          |                   |          |
|--------------------------------|------------------------|----------------------|----------------------|----------|-------------------|----------|
|                                | CON <sup>a</sup>       | SHA                  | DE                   | LP       | BB                | LB(3:2)  |
| Lactobacillus murinus group    | 13.0±11.1 <sup>b</sup> | 7.7±5.3              | 2.4±1.9 <sup>#</sup> | 6.4±6.1  | 3.0±2.2           | 6.3±6.3  |
| EU622763_s_group               | 9.6±5.7                | 4.7±5.6              | 5.9±3.5              | 7.3±4.6  | 4.2±2.9           | 4.9±2.0  |
| Paraprevotella_uc              | 4.4±4.9                | 2.5±4.3              | 3.2±2.6              | 3.8±4.1  | 1.4±1.2           | 1.2±1.6  |
| Lactobacillus_uc               | 3.6±4.2                | 3.2±1.7              | 0.5±0.3 <sup>#</sup> | 1.2±1.4  | 0.4±0.3           | 1.5±1.9  |
| Bacteroides acidifaciens group | 3.5±2.0                | 2.4±1.1              | 5.5±3.1              | 1.5±0.5* | 2.6±1.7           | 2.9±1.7  |
| FJ880724_s                     | 3.4±3.4                | 1.9±2.9              | 2.6±2.1              | 3.1±2.8  | 1.3±0.9           | 1.1±1.3  |
| EF602869_s                     | 3.3±2.4                | 1.0±2.3              | 2.8±1.5              | 1.1±1.4* | ND <sup>c,*</sup> | 0.1±0.2* |
| PAC001068_g_uc                 | 2.1±0.5                | 3.0±1.3              | 1.6±0.8 <sup>#</sup> | 2.3±1.3  | 2.6±0.9*          | 4.8±1.3* |
| AB606236_s                     | 1.6±2.2                | 1.2±2.4              | 0.0±0.0              | 0.1±0.2  | 1.1±2.2           | 0.4±1.0  |
| Ruminococcus_uc                | 1.4±0.9                | 0.7±1.1              | 0.6±0.5              | 0.5±0.5  | 0.4±0.5           | 0.1±0.1* |
| PAC001982_s                    | 1.4±1.2                | 0.6±0.8              | 1.4±1.2              | 0.2±0.3* | 0.2±0.3*          | 1.2±1.5  |
| AB599946_s                     | 1.3±1.7                | 2.0±2.0              | 2.3±1.7              | 4.9±3.6  | 2.5±1.5           | 3.7±2.9  |
| PAC000186_g_uc                 | 1.2±0.5                | 1.3±0.7              | 1.0±0.6              | 1.9±0.8* | 2.7±1.1*          | 2.3±1.6  |
| Bacteroides_uc                 | 1.2±0.8                | 0.8±0.7              | 1.8±1.3              | 1.2±1.3  | 0.9±0.3           | 1.0±0.8  |
| PAC002445_s                    | 1.1±0.6                | 0.7±0.6              | 0.8±0.6              | 0.7±0.3  | 1.0±0.5           | 0.8±0.9  |
| PAC001081_s_group              | 1.1±0.8                | 0.7±0.9              | 1.0±0.8              | 0.5±0.5  | 0.4±0.5           | 0.1±0.2* |
| Prevotella_uc                  | 1.1±0.8                | 0.7±0.7              | 0.4±0.3              | 0.7±0.6  | 0.4±0.4           | 0.5±0.2  |
| PAC002443_s                    | 0.9±0.7                | 1.1±1.1              | 0.5±0.4              | 1.3±2.0  | 1.1±0.7           | 4.0±4.2* |
| AB606242_s                     | 0.9±1.7                | 1.2±2.0              | 3.2±3.1              | 0.3±0.6* | 0.1±0.1*          | 0.0±0.0* |
| PAC002476_s                    | 0.8±0.7                | 0.5±0.3              | 0.6±0.6              | 0.4±0.3  | 0.3±0.1           | 0.8±0.5  |
| Akkermansia muciniphila        | 0.8±1.3                | 1.2±2.3              | 4.2±5.7              | 1.2±1.2  | 0.5±0.8           | 1.7±2.2  |
| PAC001070_s_group              | 0.7±0.3                | 1.2±0.4 <sup>†</sup> | 0.4±0.3 <sup>#</sup> | 0.6±0.4  | 0.4±0.3           | 1.8±0.5* |
| Lactobacillus reuteri group    | 0.6±0.9                | 2.6±3.9              | 0.9±0.9              | 0.4±0.4  | 0.2±0.1           | 0.7±1.0  |
| Lactobacillus gasseri group    | 0.6±0.5                | 4.0±5.9              | 2.5±4.0              | 1.4±1.1  | 0.3±0.2           | 0.5±0.4  |

|                   |         |         |                      |         |         |         |
|-------------------|---------|---------|----------------------|---------|---------|---------|
| PAC002482_s group | 0.6±0.4 | 0.2±0.2 | 1.0±0.8 <sup>#</sup> | 0.5±0.4 | 0.6±0.6 | 0.7±0.9 |
|-------------------|---------|---------|----------------------|---------|---------|---------|

<sup>a</sup>)NK151 (LP), NK175 (BB), and their (3:2) mixture (LB, 5×10<sup>9</sup> CFU/mouse/day) orally gavaged daily for 10 days from 25 h after the exposure to ELA (exorbital lacrimal gland excision and 1% atropine/0.1% benzalkonium chloride solution treatment). Normal control mice (CON) and mice exposed with the ELA (DE) were treated with vehicle instead of probiotics.

<sup>b</sup>)Data values were described as mean ± SD (n = 7).

<sup>c</sup>)not detected

<sup>#</sup>p<0.05 vs. SHA group. \*p<0.05 vs. DE group.

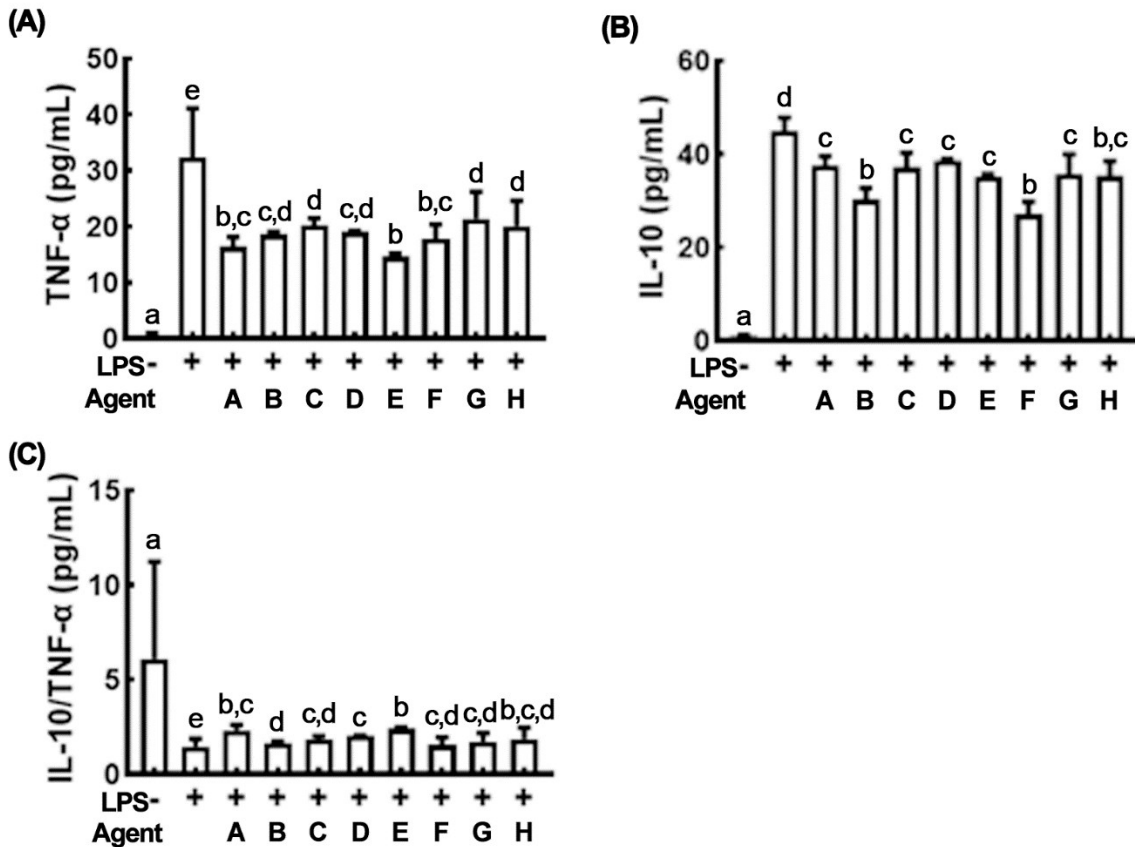

Figure S1. Effects of five gut bacteria isolated from the human fecal bacteria collection on the LPS-induced TNF- $\alpha$  and IL-10 expression in macrophage cells. Effects on TNF- $\alpha$  (A) and IL-10 expression (B) and IL-10 to TNF- $\alpha$  expression ratio (C). Macrophage cells ( $1 \times 10^6$ /mL) isolated from peritoneal cavity were incubated with gut bacteria ( $1 \times 10^5$  CFU/mL) in the absence or presence of LPS. Control group (CON) was treated with saline instead of LPS. A-D (A, NK151) were Lactobacilli and E-H (E, NK175) were Bifidiobacteria. Data values were described as mean  $\pm$  SD (n = 4). Means with same letters are not significantly different (p < 0.05).

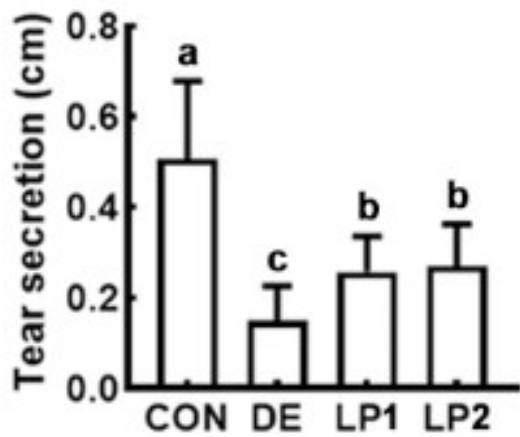

Figure S2. Effect of NK151 on the ELA-induced dry eye in C57BL/6 mice. NK151 (LP1,  $5 \times 10^8$  CFU/mouse/day; LP2,  $1 \times 10^9$  CFU/mouse/day) orally gavaged daily for 10 days from 25 h after the exposure to ELA (exorbital lacrimal gland excision and 1% atropine/0.1% benzalkonium chloride solution treatment). Normal control mice (CON), and mice exposed with the ELA (DE) were treated with vehicle instead of probiotics. Data values were described as mean  $\pm$  SD (n = 7). Means with same letters are not significantly different ( $p < 0.05$ ).

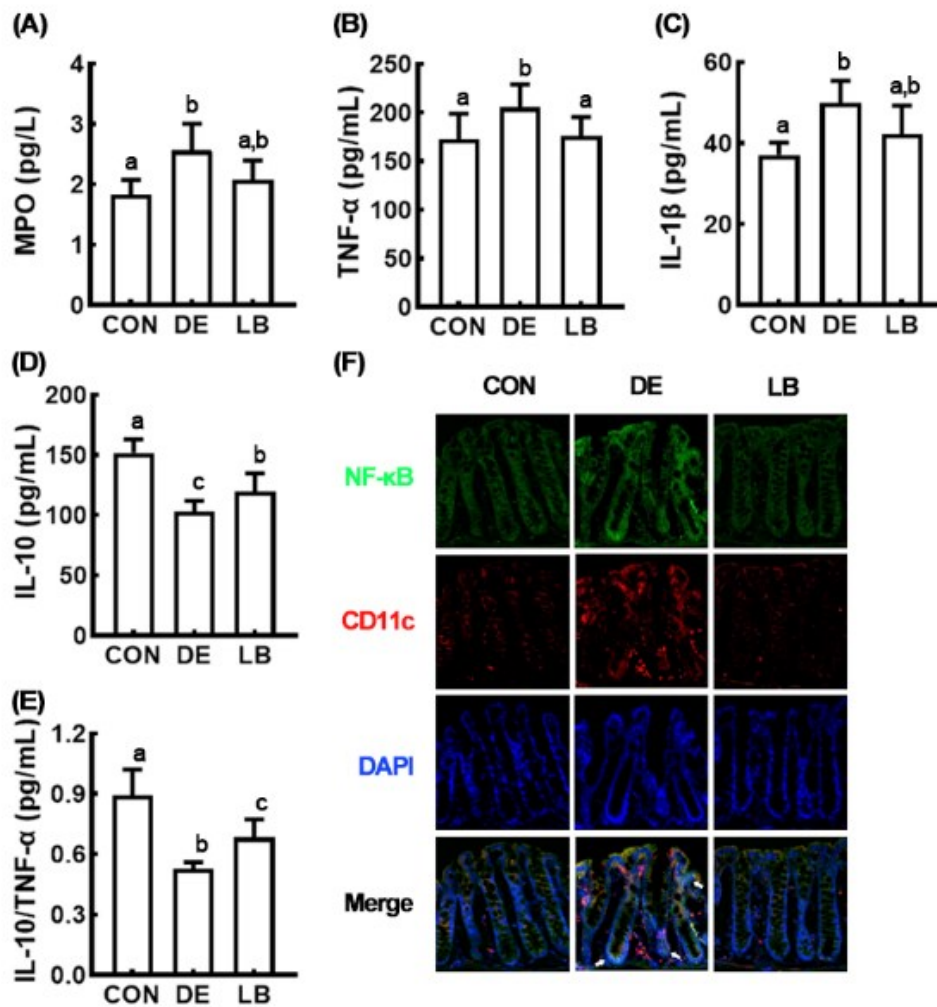

Figure S3. The mixture of NK151 and NK175 (4:1), NKm, alleviated ELA-induced colitis in BALB/c mice. Effects on the myeloperoxidase (MPO) activity (A), TNF- $\alpha$  (B), IL-1 $\beta$  (C), and IL-10 expression (D), and IL-10 to TNF- $\alpha$  expression ratio (E), and NF- $\kappa$ B<sup>+</sup>/CD11c<sup>+</sup> cell population (F) in the colon. NKm (the NK151 and NK175 [4:1] mixture,  $5 \times 10^9$  CFU/mouse/day) orally gavaged daily for 10 days from 25 h after the exposure to ELA (exorbital lacrimal gland excision and 1% atropine/0.1% benzalkonium chloride solution treatment). Normal control mice (CON) and mice exposed with the ELA (DE) were treated with vehicle instead of probiotics. Data values were described as mean  $\pm$  SD (n = 7). Means with same letters are not significantly different (p < 0.05).
